# Supplementary material
Source: PubMed Central journal article supplement (PMC4033380)
Supplement: ASN.2013080860_ASN2013080860SupplementaryData.pdf [file ASN.2013080860_ASN2013080860SupplementaryData.pdf]

**Supplementary table 1.** The association between sTNFRs and markers of kidney dysfunction in individuals with and without diabetes.

| Diabetes status  | Kidney marker | Model A - Linear regression models, B-coefficients<br>(95% confidence intervals) |                            |                            |
|------------------|---------------|----------------------------------------------------------------------------------|----------------------------|----------------------------|
|                  |               | PIVUS<br>sTNFR1                                                                  | PIVUS<br>sTNFR2            | ULSAM<br>sTNFR1            |
|                  | All           |                                                                                  |                            |                            |
| Without diabetes | GFR           | -0.58***<br>(-0.64, -0.53)                                                       | -0.48***<br>(-0.55, -0.42) | -0.50***<br>(-0.56, -0.43) |
|                  | ACR           | 0.20***<br>(0.12, 0.27)                                                          | 0.13**<br>(0.051, 0.21)    | 0.19***<br>(0.11, 0.28)    |
|                  | U-KIM-1       | 0.12**<br>(0.049, 0.19)                                                          | 0.11<br>(0.034, 0.18)      | 0.15**<br>(0.06, 0.23)     |
| With diabetes    | GFR           | -0.78***<br>(-0.96, -0.59)                                                       | -0.64***<br>(-0.78, -0.50) | -0.52***<br>(-0.68, -0.35) |
|                  | ACR           | 0.24*<br>(0.041, 0.43)                                                           | 0.21*<br>(0.061, 0.37)     | 0.20*<br>(0.033, 0.37)     |
|                  | U-KIM-1       | 0.0019<br>(-0.27, 0.27)                                                          | -0.030<br>(-0.25, 0.19)    | 0.12<br>(-0.12, 0.36)      |

There were 703 individuals without diabetes and 112 with diabetes in PIVUS, and 671 individuals without diabetes and 107 with diabetes in ULSAM.
